# Supplementary material for: The Role of SOX9 in IGF-II-Mediated Pulmonary Fibrosis
Source: MDPI journal article supplement (doi:10.3390/ijms241411234), 2023-07-08
Supplement: s1 [file s1]

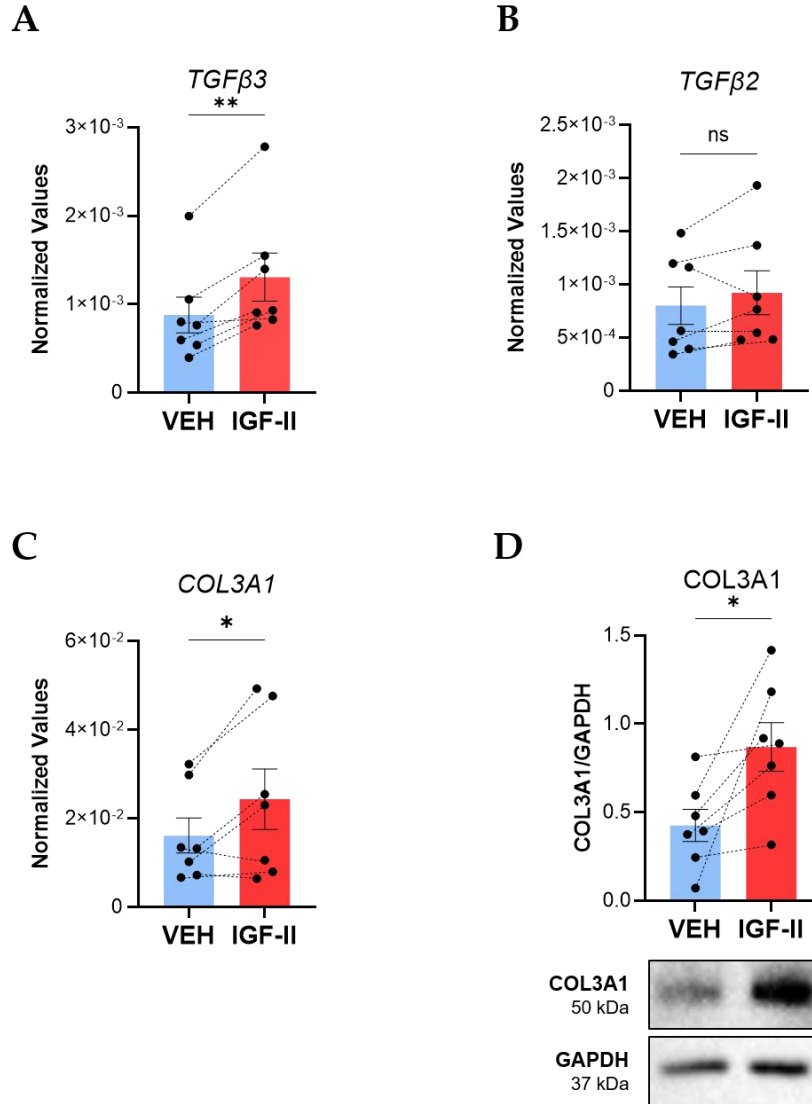

**Figure S1: IGF-II promotes fibrosis in normal human lung (NL) tissue explants from multiple donors.** (A) Transcript levels of *TGFβ3* in ex vivo NL tissue explants treated with vehicle or IGF-II for 48h (n=7). (B) Transcript levels of *TGFβ2* in NL tissue explants as described for Panel A (n=7). (C) Transcript levels of *COL3A1* in NL tissue explants treated for 24h (n=7). (D) *COL3A1* levels in NL tissue homogenates after 24h stimulation (n=7). The dashed lines indicate pairing between cell lines from the same donor. Raw  $2^{-\Delta CT}$  values are graphed for qPCR data after normalization to the housekeeping gene *B2M*. Raw densitometry values determined by ImageJ software after normalization to GAPDH are plotted for immunoblot quantification. Paired Student's *t*-Test, ns = not significant, \*  $p \leq 0.05$ , \*\*  $p \leq 0.01$ . Mean  $\pm$  SEM.

A

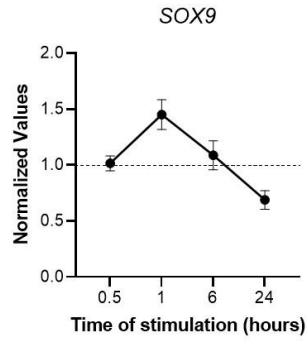

B

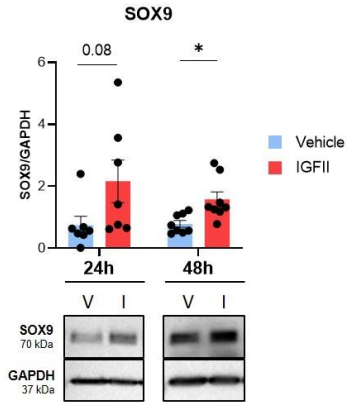

C

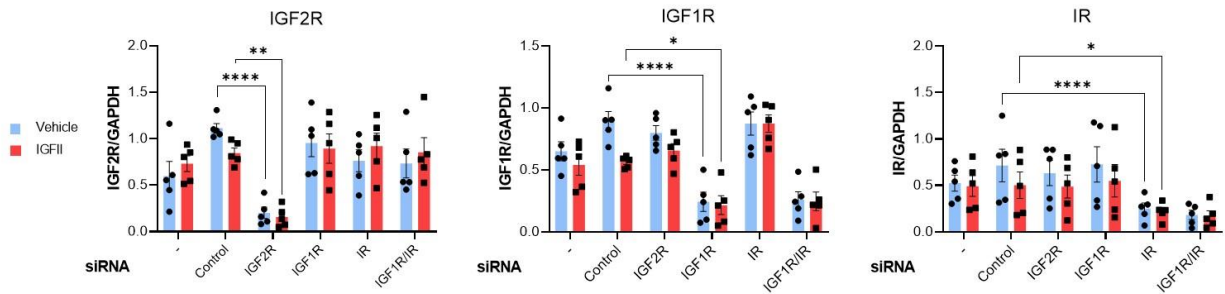

**Figure S2:** NL fibroblasts were stimulated with recombinant human IGF-II (200 ng/mL) or vehicle control (PBS) and SOX9 levels were measured. **(A)** qPCR analysis of *SOX9* levels normalized to *B2M* in fibroblasts treated with IGF-II for multiple timepoints: 0.5h, 1h, 6h, and 24h (n=6). The vehicle levels are set to 1 and shown in the dashed line. Mean  $\pm$  SEM graphed for IGF-II. Two-Way ANOVA: 1h,  $p = 0.094$ ; 24h,  $p = 0.055$ . **(B)** Representative immunoblots and quantification of SOX9 in lysates after 24h (n=7) and 48h (n=8) of IGF-II stimulation in human NL fibroblasts. Raw densitometry values measured by Image J software and normalized to GAPDH. Paired Student's *t*-Test **(C)** The IGF system receptors – IGF2R, IGF1R, IR, and hybrid IGF1R/IR – were silenced in lung fibroblasts before stimulation with vehicle/PBS and IGF-II for 4h (n=5). Immunoblot quantification of receptor levels to confirm transfection efficiency. Representative immunoblots shown in Figure 2E. Data normalized to GAPDH loading control. (-): Non-transfected control. V: vehicle/PBS; I: IGF-II. Repeated Measures Two-way ANOVA with Bonferroni correction for 2 pairwise comparisons, \*  $p \leq 0.05$ , \*\*  $p \leq 0.01$ , \*\*\*\*  $p \leq 0.0001$ . Mean  $\pm$  SEM.

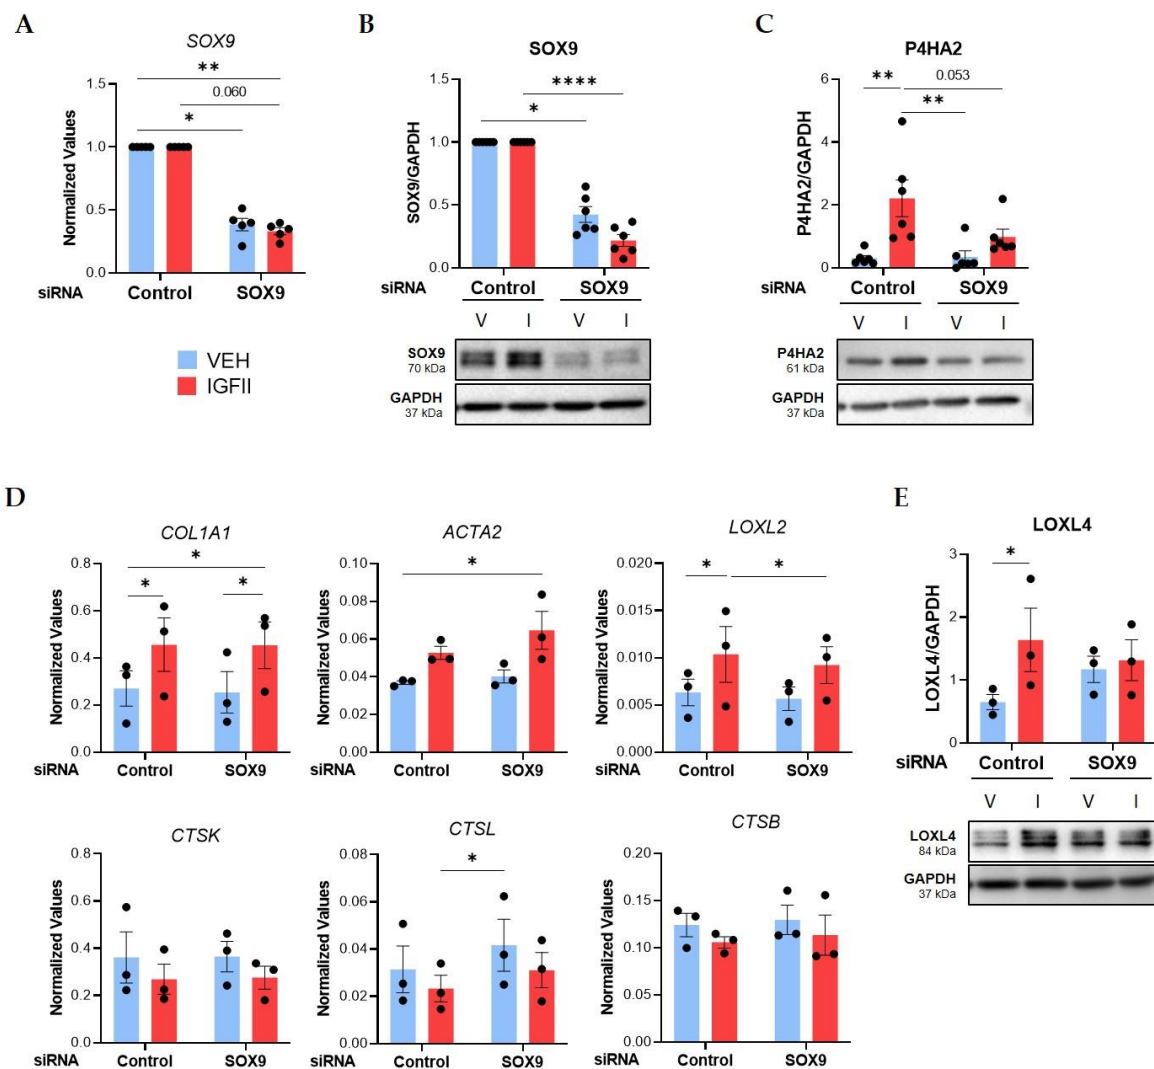

**Figure S3:** Normal human lung fibroblasts from different donors were transfected with non-targeting control or SOX9-specific siRNA before stimulation with vehicle/PBS (V) and IGF-II (I) for 24 or 48 hours **(A)** qPCR analysis of SOX9 transcripts in 24h samples (n=5). **(B)** SOX9 protein levels and representative immunoblot in 48h lysates (n=6). Fold change values are graphed with the results of repeated measures ANOVA between the normalized raw values of control and SOX9-silenced samples respective to treatment. **(C)** Protein levels of P4HA2 in 48h lysates (n=6). **(D)** Transcript levels of SOX9-independent targets in 24h samples (n=3). **(E)** Protein levels of LOXL4 in 48h lysates (n=3). Raw  $2^{-\Delta CT}$  values are graphed for qPCR data after normalization to the housekeeping gene (*GAPDH* or *B2M*). Raw densitometry values determined by ImageJ software are plotted for immunoblot quantification. Repeated Measures ANOVA with Tukey post hoc test, \*  $p \leq 0.05$ , \*\*  $p \leq 0.01$ , \*\*\*\*  $p \leq 0.0001$ . Mean  $\pm$  SEM.

**Table S1:** SSc patient characteristics: EA, European American; AA, African American; PF, pulmonary fibrosis; PAH, pulmonary arterial hypertension; NA, not available.

| Donor Code | Age (years) | Sex    | Ethnicity | Diagnosis | Smoker |
|------------|-------------|--------|-----------|-----------|--------|
| SSc-8      | 26          | Female | EA        | PF        | No     |
| SSc-11     | 45          | Male   | EA        | PF        | No     |
| SSc-19     | 37          | Female | EA        | PF        | No     |
| SSc-23     | 51          | Female | EA        | PF        | Yes    |
| SSc-24     | 45          | Male   | EA        | PF        | No     |
| SSc-26     | 57          | Male   | EA        | PF        | No     |
| SSc-27     | 41          | Female | EA        | PF        | Yes    |
| SSc-81     | 67          | Male   | EA        | PF + PAH  | NA     |
| SSc-82     | 54          | Female | EA        | PF + PAH  | No     |
| SSc-85     | 62          | Female | AA        | PF + PAH  | Yes    |
| SSc-87     | 64          | Male   | EA        | PF        | Yes    |
| SSc-110    | 50          | Male   | EA        | PF + PAH  | No     |

**Table S2:** Donor characteristics for normal lung (NL) and Scleroderma (SSc) lung tissue cores used to quantify baseline SOX9 levels.

| Characteristics         | NL             | SSc            |
|-------------------------|----------------|----------------|
| n                       | 10             | 12             |
| Age (Average $\pm$ SEM) | 44.6 $\pm$ 2.3 | 49.9 $\pm$ 3.3 |
| Male                    | 5              | 6              |
| Female                  | 4              | 6              |
| NA                      | 1              | -              |
| EA                      | 6              | 11             |
| AA                      | -              | 1              |
| NA                      | 4              | -              |

**Table S3:** List of small interfering RNA (siRNA) reagents used in experiments.

| siRNA Target                                | Catalog Number   | Species | Company              |
|---------------------------------------------|------------------|---------|----------------------|
| IGF1R                                       | L-003012-00-0005 | Human   | Dharmacon by Horizon |
| IGF2R                                       | L-010601-00-0005 | Human   | Dharmacon by Horizon |
| INSR                                        | L-003014-00-0005 | Human   | Dharmacon by Horizon |
| SOX9                                        | L-021507-00-0005 | Human   | Dharmacon by Horizon |
| On-Target Plus Non-Targeting Pool (Control) | D-001810-10-20   | Human   | Dharmacon by Horizon |

**Table S4:** List of primers purchased from Thermo Fisher Scientific for qPCR.

| Primer Target | Catalog Number | Species | Reporter |
|---------------|----------------|---------|----------|
| <i>ACTA2</i>  | Hs00426835_g1  | Human   | FAM      |
| <i>B2M</i>    | Hs00187842_ml  | Human   | VIC      |
| <i>COL1A1</i> | Hs00164004_ml  | Human   | FAM      |
| <i>COL3A1</i> | Hs00943809_m1  | Human   | FAM      |
| <i>CTSB</i>   | Hs00947433_m1  | Human   | FAM      |
| <i>CTSK</i>   | Hs00166156_m1  | Human   | FAM      |
| <i>CTSL</i>   | Hs00964650_m1  | Human   | FAM      |
| <i>GAPDH</i>  | Hs02758991_g1  | Human   | FAM      |
| <i>LOX</i>    | Hs00184700_m1  | Human   | FAM      |
| <i>LOXL2</i>  | Hs00158757_m1  | Human   | FAM      |
| <i>P3H2</i>   | Hs00216998_m1  | Human   | FAM      |
| <i>P4HA2</i>  | Hs00990001_m1  | Human   | FAM      |
| <i>SOX9</i>   | Hs00165814_m1  | Human   | FAM      |
| <i>TGFβ2</i>  | Hs00234244_m1  | Human   | FAM      |
| <i>TGFβ3</i>  | Hs01086000_m1  | Human   | FAM      |

**Table S5:** List of antibodies used for immunoblotting.

| Target                                                     | Company        | Catalog Number | Primary Dilution | Secondary Dilution |
|------------------------------------------------------------|----------------|----------------|------------------|--------------------|
| Amersham ECL Rabbit IgG, HRP-linked whole Ab (from donkey) | Cytiva         | NA934          | -                | -                  |
| Anti-goat IgG HRP                                          | Santa Cruz     | SC-2354        | -                | -                  |
| Anti-Mouse IgG (H+L), HRP Conjugate                        | Promega        | W4021          | -                | -                  |
| Cathepsin K                                                | Santa Cruz     | SC-48353       | 1:1000           | 1:5000             |
| COL3A1 (S-17)-R                                            | Santa Cruz     | SC-8780-R      | 1:1000           | 1:1000             |
| GAPDH                                                      | Santa Cruz     | SC-47724       | 1:5000           | 1:10,000           |
| IGF1Rβ                                                     | Cell Signaling | 3027           | 1:1000           | 1:5000             |
| IGF2R                                                      | Cell Signaling | 15128          | 1:1000           | 1:5000             |
| IRβ                                                        | Cell Signaling | 23413          | 1:1000           | 1:5000             |
| LOXL4                                                      | Santa Cruz     | SC-48731       | 1:1000           | 1:5000             |
| P4HA2                                                      | Novus          | NB110-40494    | 1:1000           | 1:5000             |
| P4HB                                                       | Chemicon       | MAB2701        | 1:1000           | 1:5000             |
| SOX9                                                       | Cell Signaling | 82630          | 1:1000           | 1:5000             |
| TBP                                                        | Abcam          | ab51841        | 1:1000           | 1:5000             |
